# Supplementary material
Source: PubMed Central journal article supplement (PMC6931792)

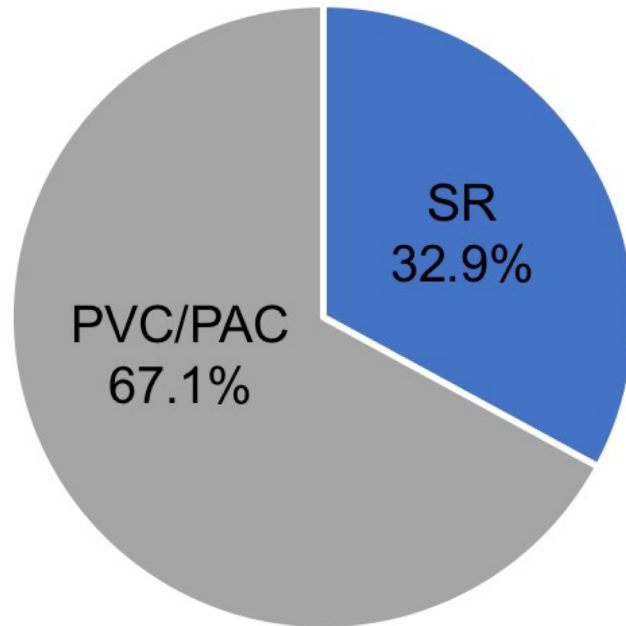

Supplement: ANEC-24-e12615-s001.pdf [file ANEC-24-e12615-s001.pdf]
